# Supplementary material
Source: Elsevier journal article supplement (https://www.sciencedirect.com/science/article/pii/S0025775321002098)
Supplement: mmc1 [file S0025775321002098:mmc1.doc]

**SUPPLEMENTARY MATERIAL**

**Supplementary Figure-1.** Flow chart of studied COVID-19 patients.

**
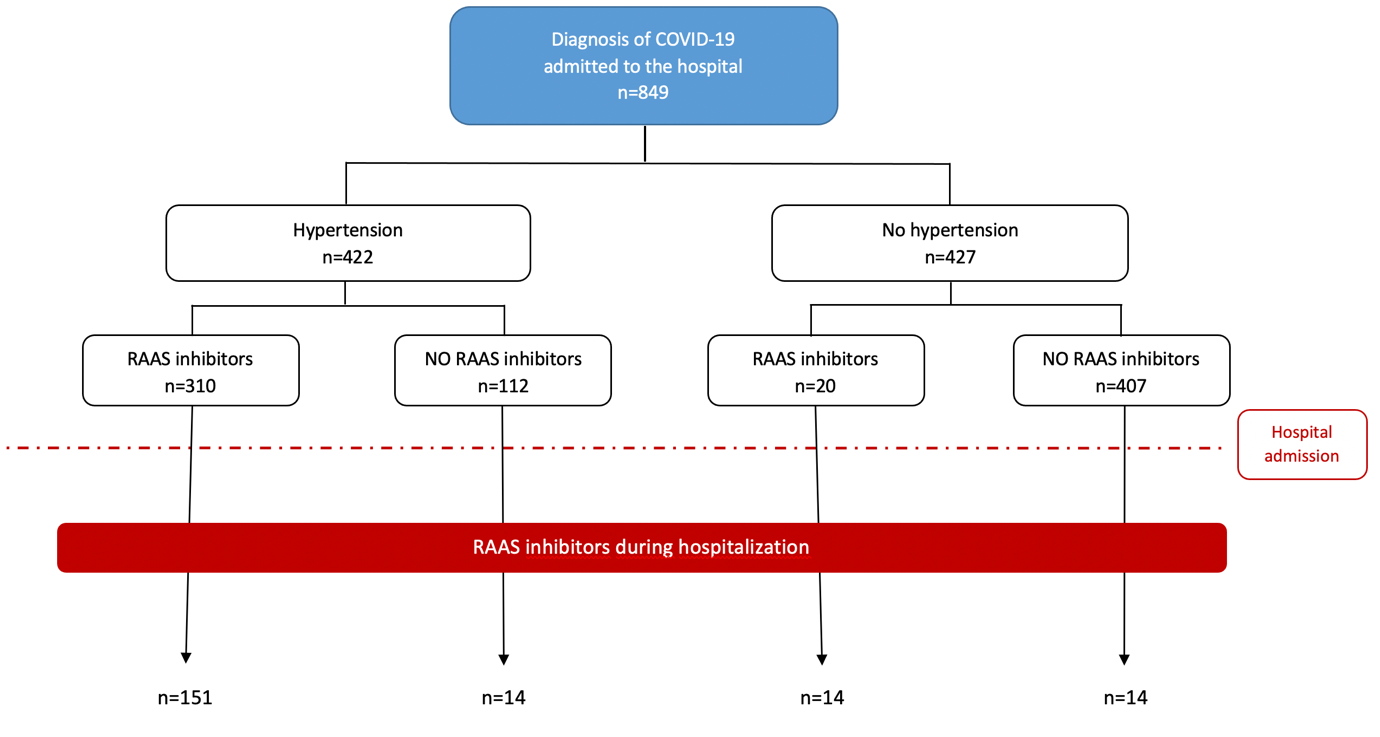
**

**Supplementary Figure-2.** Prisma flow diagram for meta-analysis.

**
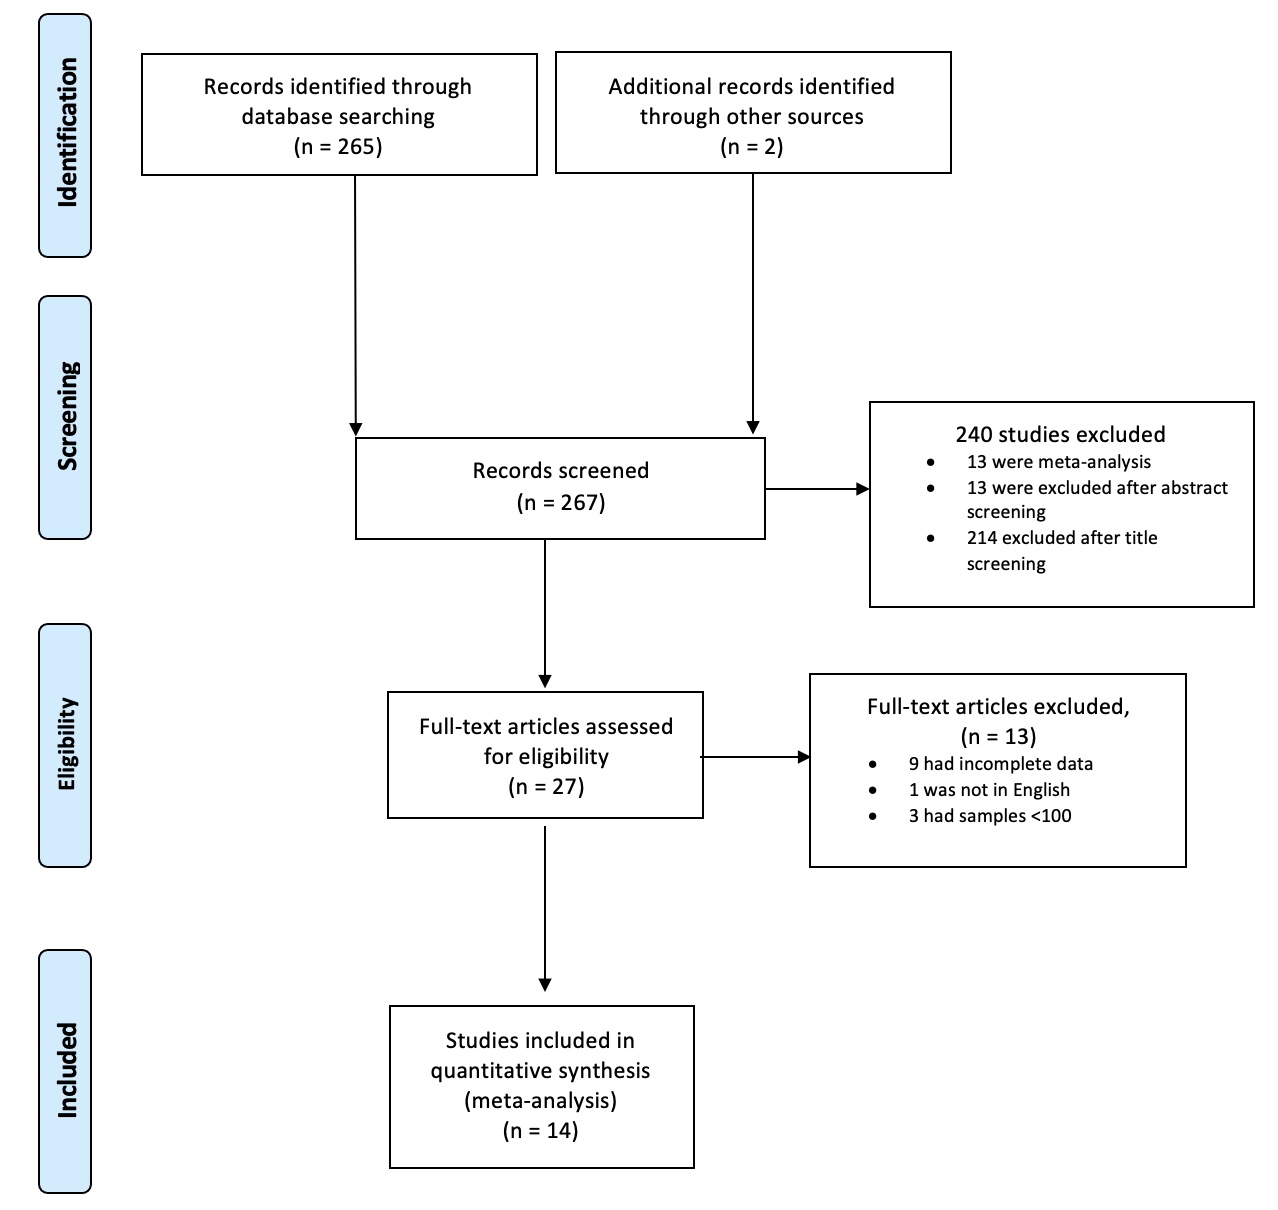
**

**Supplementary Table-1.** Main features of the selected studies for the comparison of hypertensive COVID-19 patients with and without renin-angiotensin-aldosterone system inhibitors.

| **First author** | **Journal/Year** | **Design** | **Num. of hypertensive patients** | **Num. (%) with RAAS inhibitors** | **Num. (%) without RAAS inhibitors** | **Mortality of RAAS users (%)** | **Mortality of non-RAAS users (%)** | **Newcastle-Ottawa Scale** |
| --- | --- | --- | --- | --- | --- | --- | --- | --- |
| Meng X, et al. 11 | Sci China Life Sci./2020 | Single center Retrospective | 259 | 73/259 (28.2%) | 186/259 (71.8%) | 4/73 (5.5%) | 51/186 (27.4%) | 8 to 9 |
| Chen C, et al. 12 | J Am Heart Assoc./2020 | Single center Retrospective | 1,182 | 355/1,182 (30%) | 827/1,182 (70%) | 12/355 (3.4%) | 95/827 (11.5%) | 7 to 9 |
| Pan W, et al. 13 | Hypertension/2020 | Single center Retrospective | 282 | 41/282 (14.5%) | 241/282 (85.5%) | 4/41 (9.7%%) | 63/241 (26.1%) | 7 to 9 |
| Yang G, et al. **14** | Hypertension/2020 | Single center Retrospective | 126 | 43/126 (34.1%) | 83/126 (65.9%) | 2/43 (4.6%) | 11/83 (13,2%) | 5 to 9 |
| Felice C, et al.15 | Am J Hypertens./2020 | Single center Retrospective | 133 | 82/133 (61.6%) | 51/133 (38.4%) | 15/82 (18.3%) | 18/82 (35.3%) | 5 to 9 |
| Palazzuoli A, et al. 16 | J Am Heart Assoc./2020 | Multi-center  Retrospective | 451 | 296/451 (65.6%) | 155/451 (34.4%) | 47/296 (15.9%) | 41/155 (26.4%) | 6 to 9 |
| Gao C, et al. 17 | Eur Heart J./2020 | Single center Retrospective | 710 | 183/710 (25.8%) | 527/710 (74.2%) | 4/183 (21.8%) | 19/527 (3.6%) | 7 to 9 |
| Negreira-Caamaño M, et al. 18 | High Blood Press Cardiovasc Prev./2020 | Single center Retrospective | 545 | 392/545 (71.9%) | 153/545 (28.1%) | 119/392 (30.3%) | 63/119 (52.9%) | 5 to 9 |
| Xu J, et al. 19 | Front Med./2020 | Single center Retrospective | 101 | 40/101 (39.6%) | 61/101 (60.4%) | 11/40 (27.5%) | 21/61 (34.4%) | 9 to 9 |
| Lam KW, et al 20 | J Infect Dis./2020 | Single center Retrospective | 614 | 335/614 (54,7%) | 279/614 (45,5%) | 58/335 (17.3%) | 62/279 (22.2%) | 8 to 9 |
| Li J, et al. 21 | JAMA Cardiol./2020 | Single center Retrospective | 362 | 115/362 (31.8%) | 247/362 (68.2%) | 21/115 (18.3%) | 56/247 (22.7%) | 4 to 9 |
| Covino M, et al. 22 | Intern Med J./2020 | Single center Retrospective | 166 | 111/166 (66.9%) | 55/166 (33,1%) | 20/111 (18%) | 9/55 (16.3%) | 6 to 9 |
| Hu J, et al. 23 | J Infect. /20202 | Single center Retrospective | 149 | 65/149 (43.6%) | 84/149 (56,4%) | 1/65 (1.5%) | 0 | 5 to 9 |
| Selçuk M, et al. 24 | Clin Exp Hypertens./2020 | Single center Retrospective | 113 | 74/113 (65.5%) | 39/113 (34.5%) | 31/74 (65.4%) | 4/39 (10.2%) | 4 to 9 |

**Abbreviation:** RAAS: renin-angiotensin-aldosterone system inhibitor

**Supplementary references**

**SR1.** Guan WJ, Ni ZY, Hu Y, Liang WH, Ou CQ, He JX, et al. China Medical Treatment Expert Group for Covid-19. Clinical Characteristics of Coronavirus Disease 2019 in China. N Engl J Med. 2020;382:1708-20.

**SR2.** Furuhashi M, Moniwa N, Mita T, Fuseya T, Ishimura S, Ohno K, et al. Urinary angiotensin-converting enzyme 2 in hypertensive patients may be increased by olmesartan, an angiotensin II receptor blocker. Am J Hypertens. 2015;28:15-21.

**SR3.** Eiras S, Alvarez E, Brión M, González-Juanatey JR. COVID-19 and guided therapy with biochemistry and molecular diagnostic tests for reduction of myocardial damage and cardiotoxicity. *Rev Esp Cardiol (Engl Ed)*. 2020;73(8):691-693. doi:10.1016/j.rec.2020.05.009

SR4. Burchill LJ, Velkoska E, Dean RG, Griggs K, Patel SK, Burrell LM. Combination renin-angiotensin system blockade and angiotensin-converting enzyme 2 in experimental myocardial infarction: implications for future therapeutic directions. Clin Sci (Lond). 2012;123:649-58.

**SR5.** Kuba K, Imai Y, Rao S, Gao H, Guo F, Guan B, et al. A crucial role of angiotensin converting enzyme 2 (ACE2) in SARS coronavirus-induced lung injury. Nat Med. 2005;11:875-9.

**SR6.** Lahens A, Mullaert J, Gressens S, Gault N, Flamant M, Deconinck L, et al. Association between renin-angiotensin-aldosterone system blockers and outcome in coronavirus disease 2019: analysing in-hospital exposure generates a biased seemingly protective effect of treatment. J Hypertens. 2021 Feb 1;39(2):367-375. doi: 10.1097/HJH.0000000000002658. PMID: 33021511.

**SR7.** Amat-Santos IJ, Santos-Martinez S, López-Otero D, Nombela-Franco L, Gutiérrez-Ibanes E, Del Valle R, et al. Ramipril in High Risk Patients with COVID-19. J Am Coll Cardiol. 2020;76(3):268-276. doi:10.1016/j.jacc.2020.05.040
